# Supplementary material
Source: PubMed Central journal article supplement (PMC3055546)
Supplement: tjp0589-0609-SD2.pdf [file tjp0589-0609-SD2.pdf]

Table S1. PCR primers for single-cell RT-PCR

| Marker     | Genbank #   | First PCR primers                                                             | Size | Second PCR primers                                                         | Size |
|------------|-------------|-------------------------------------------------------------------------------|------|----------------------------------------------------------------------------|------|
| CB         | NM_009788.4 | Sense,139:CGAAAGAAGGCTGGATTGGAG<br>Antisense,544:CCCACACATTTTGATTCCCTG*       | 426  | Sense,194:ATGGACAGAGAGATGATGGAAAAA<br>Antisense,467:TCCAGCTTTCCGTCATTATTTG | 295  |
| CCK        | NM_031161.2 | Sense,16:TGTCTGTGCGTGGTGTATGGC*<br>Antisense,546:GCATAGCAACATTAGGTCTGGGAG*    | 554  | Sense,192:ATACATCCAGCAGGTCCGCAA<br>Antisense,408:CAGACATTAGAGGCGAGGGGT     | 237  |
| CR         | NM_007586.1 | Sense,63:TTGATGCTGACGGAAATGGGTA*<br>Antisense,327:CAAGCCTCCATAAACTCAGCG*      | 265  | Sense,141:GCTGGAGAAGGCAAGGAAGG<br>Antisense,271:ATTCTCTTCGGTCGGCAGGAT      | 151  |
| GAD65      | NM_008078.2 | Sense,99:CCAAAAGTTCACGGGCGG*<br>Antisense,454:TCCTCCAGATTTTGCGGTTG*           | 375  | Sense,219:CACCTGCGACCAAAAACCT<br>Antisense,447:GATTTTGCAGTTGGTCTGCC        | 248  |
| GAD67      | NM_008077.4 | Sense,83:ATGATACTTGGTGTGGCGTAGC*<br>Antisense,314:GTTTGCTCCTCCCGTTCTTAG*      | 253  | Sense,159:CAATAGCCTGGAAGAGAAGAGTCG<br>Antisense,314:GTTTGCTCCTCCCGTTCTTAG  | 177  |
| M1R        | NM_007698.3 | Sense,715:AGCAGCTCAGAGAGGTCACAGCCA<br>Antisense,987:GGCCTCTTGACTGTATTTGGGGA   | 272  | Same as first PCR                                                          | 272  |
| M2R        | NM_203491.1 | Sense,682:CAAGACCCGGTGTCTCCAGTCTA<br>Antisense,1050:TGACGATCCAAGTCTACTGT      | 368  | Same as first PCR                                                          | 368  |
| M3R        | NM_033269.4 | Sense,814:ACAGAAGCGGAAGCAGAAACTTT<br>Antisense,1374:TTTGAAGGACAGAGGTAGAGCGGC  | 560  | Same as first PCR                                                          | 560  |
| M4R        | NM_007699.2 | Sense,700:AAGGAGAAGAAGGCCAAGACTCTG<br>Antisense,1145:ACGAGCGATGCTGGCAAACCTTCG | 446  | Same as first PCR                                                          | 446  |
| M5R        | NM_205783.1 | Sense,907:TGTAGCAGTTGCCCTCTTCAGAG<br>Antisense,1104:AGCAGCACCTGGAGACAGGAAGTA  | 197  | Same as first PCR                                                          | 197  |
| NPY        | NM_023456.2 | Sense,16:CGAATGGGGCTGTGTGGA*<br>Antisense,289:AAGTTTCATTTCCCATCACCACAT        | 297  | Sense,38:CCCTCGCTCTATCTCTGCTCGT<br>Antisense,236:GCGTTTTCTGTGCTTTCCCTTCA   | 220  |
| PV         | NM_013645.3 | Sense,104:GCCTGAAGAAAAAGAACCCG<br>Antisense,275:AATCTTGCCGTCCCATCCT           | 275  | Sense,122:CGGATGAGGTGAAGAAGGTGT<br>Antisense,265:TCCCATCCTTGTCTCCAGC       | 163  |
| SST        | NM_009215.1 | Sense,1:ATGCTGTCCTGCCGTCTCCA*<br>Antisense,231:GCCTCATCTCGTCTGCTCA*           | 250  | Sense,41:GCATCGTCCTGGCTTTGGG<br>Antisense,191:GGGCTCCAGGGCATCATTCT         | 170  |
| SST intron | Same as SST | Sense,8:CTGTCCTCCCTTACGAATCCC<br>Antisense,228:CCAGCACCAGGGATAGAGCC           | 220  | Sense,16:CTTACGAATCCCCCAGCCTT<br>Antisense,178:TTGAAAGCCAGGGAGGAACT        | 182  |
| VGLUT1     | NM_182993.2 | Sense,124:CCCTTAGAACGGAGTCGGCT<br>Antisense,697:TATCCGACCACCAGCAGCAG          | 593  | Sense,148:ACGACAGCCTTTTGCAGTTC<br>Antisense,495:CAAAGTAGCCGGGCTGAGAG       | 367  |
| VIP        | NM_011702.2 | Sense,216:TTATGATGTGTCAAGAAATGC<br>Antisense,616:TTTTATTTGGTTTTGCTATGGAAG*    | 424  | Sense,253:GGAGTTTTACCAGCGATTACAG<br>Antisense,455:CTCACTGCTCCTCTTTCCATTCA  | 225  |

Note: Position 1, first base of the start codon.

From Karagiannis et al, 2009
