# Supplementary material
Source: PubMed Central journal article supplement (PMC3055546)
Supplement: tjp0589-0609-SD3.pdf [file tjp0589-0609-SD3.pdf]

Table S2. Genotyping primers for M1 and M3 Muscarine receptors

| Marker  | Sequences                     |
|---------|-------------------------------|
| M1S1    | 5'-CCAACATCACCGTCTTGGCAC-3'   |
| M1A1    | 5'-AGTGCCAATGATGAGATCAGC-3'   |
| NEO-1   | 5'CAGCTCATTCTCCCACTCATGAT-3'  |
| M3-A3   | 5'-AAGACCACGTAGCAGTG-3'       |
| M3-B    | 5'-CTCTCTACATCCATAGTCCC-3'    |
| M3-NEO9 | 5'-TGGATGTGGAATGTGTGCGAGG3-3' |
